# Supplementary material for: Characterizing the Causal Pathway for Genetic Variants Associated with Neurological Phenotypes Using Human Brain-Derived Proteome Data
Source: PubMed Central journal article supplement (PMC7273531; doi:10.1016/j.ajhg.2020.04.007), 2020-05-14
Supplement: mmc1.pdf [file mmc1.pdf]

**The American Journal of Human Genetics, Volume 106**

**Supplemental Data**

**Characterizing the Causal Pathway for Genetic  
Variants Associated with Neurological Phenotypes  
Using Human Brain-Derived Proteome Data**

**Nelson K. Kibinge, Caroline L. Relton, Tom R. Gaunt, and Tom G. Richardson**

Supplementary Figure 1 – A flowchart of the analysis pipeline for this study and key results

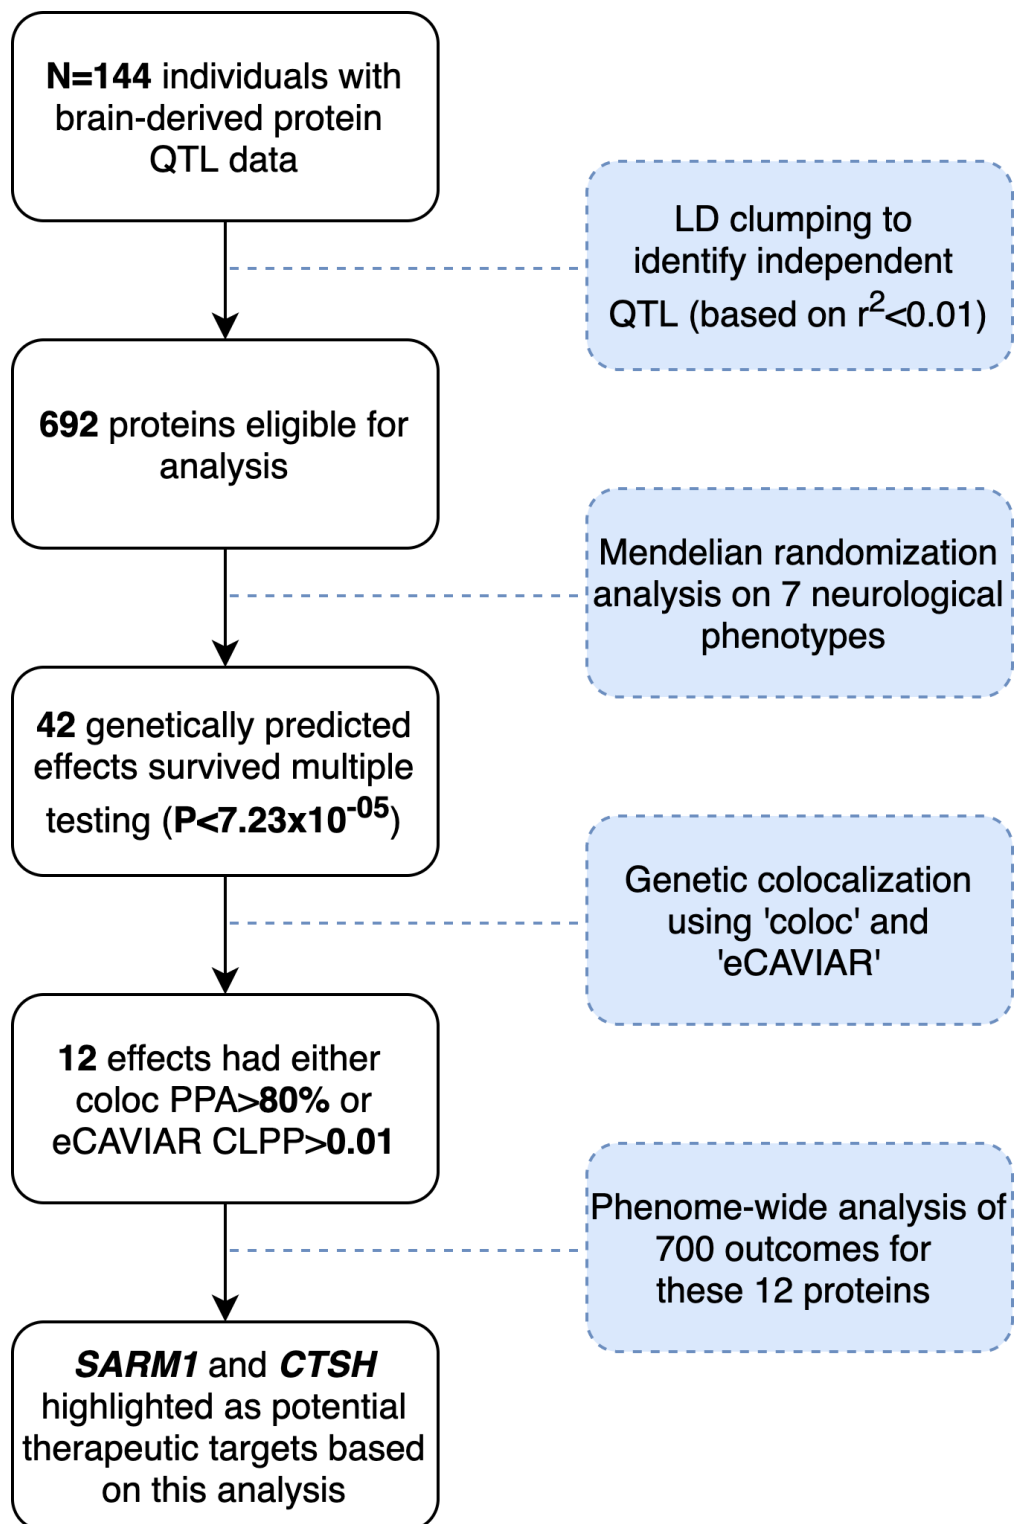

Supplementary Figure 2 – Gene expression profile for *ABCB9* across 54 tissue types in the GTEx project

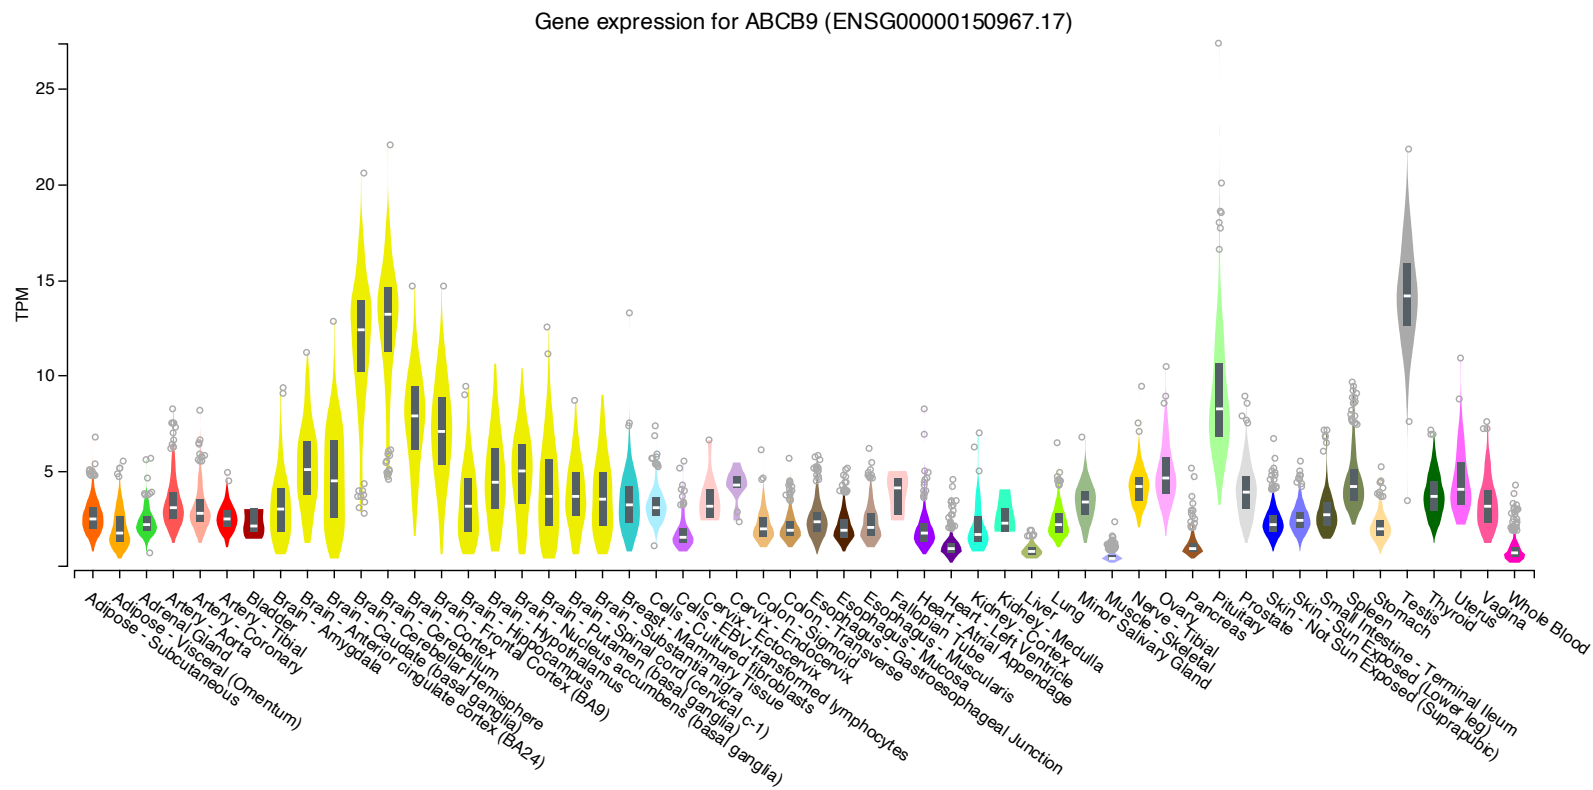

Supplementary Figure 3 – Gene expression profile for *CTSH* across 54 tissue types in the GTEx project

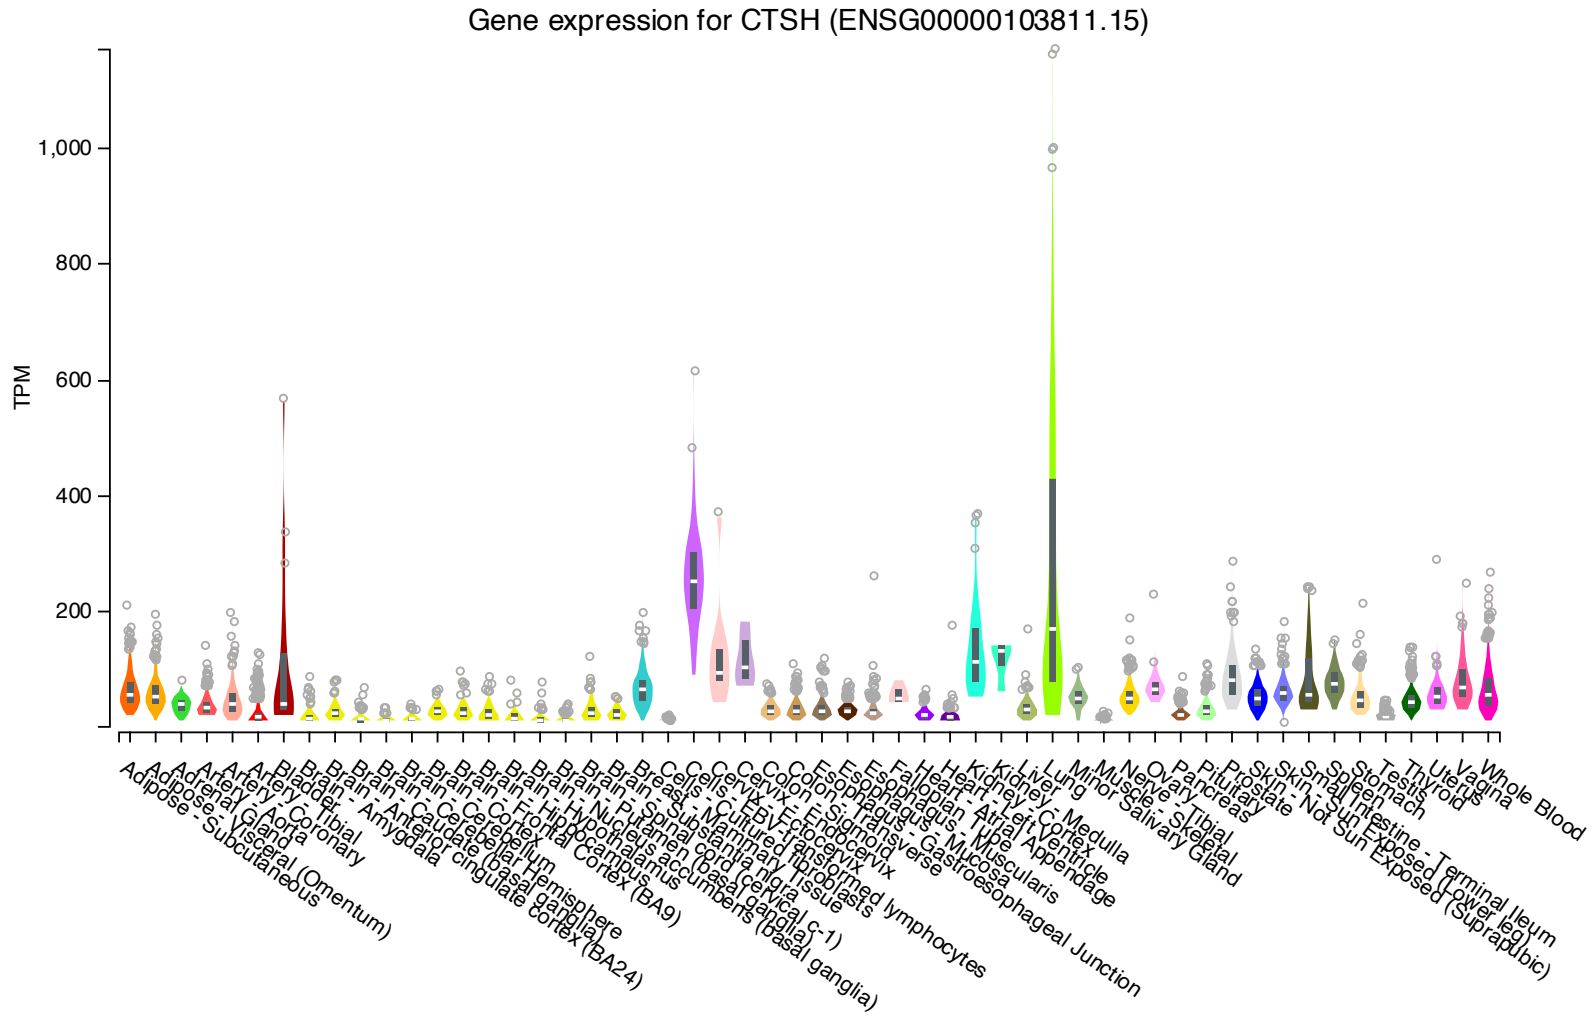

Supplementary Figure 4 – Gene expression profile for *DCC* across 54 tissue types in the GTEx project

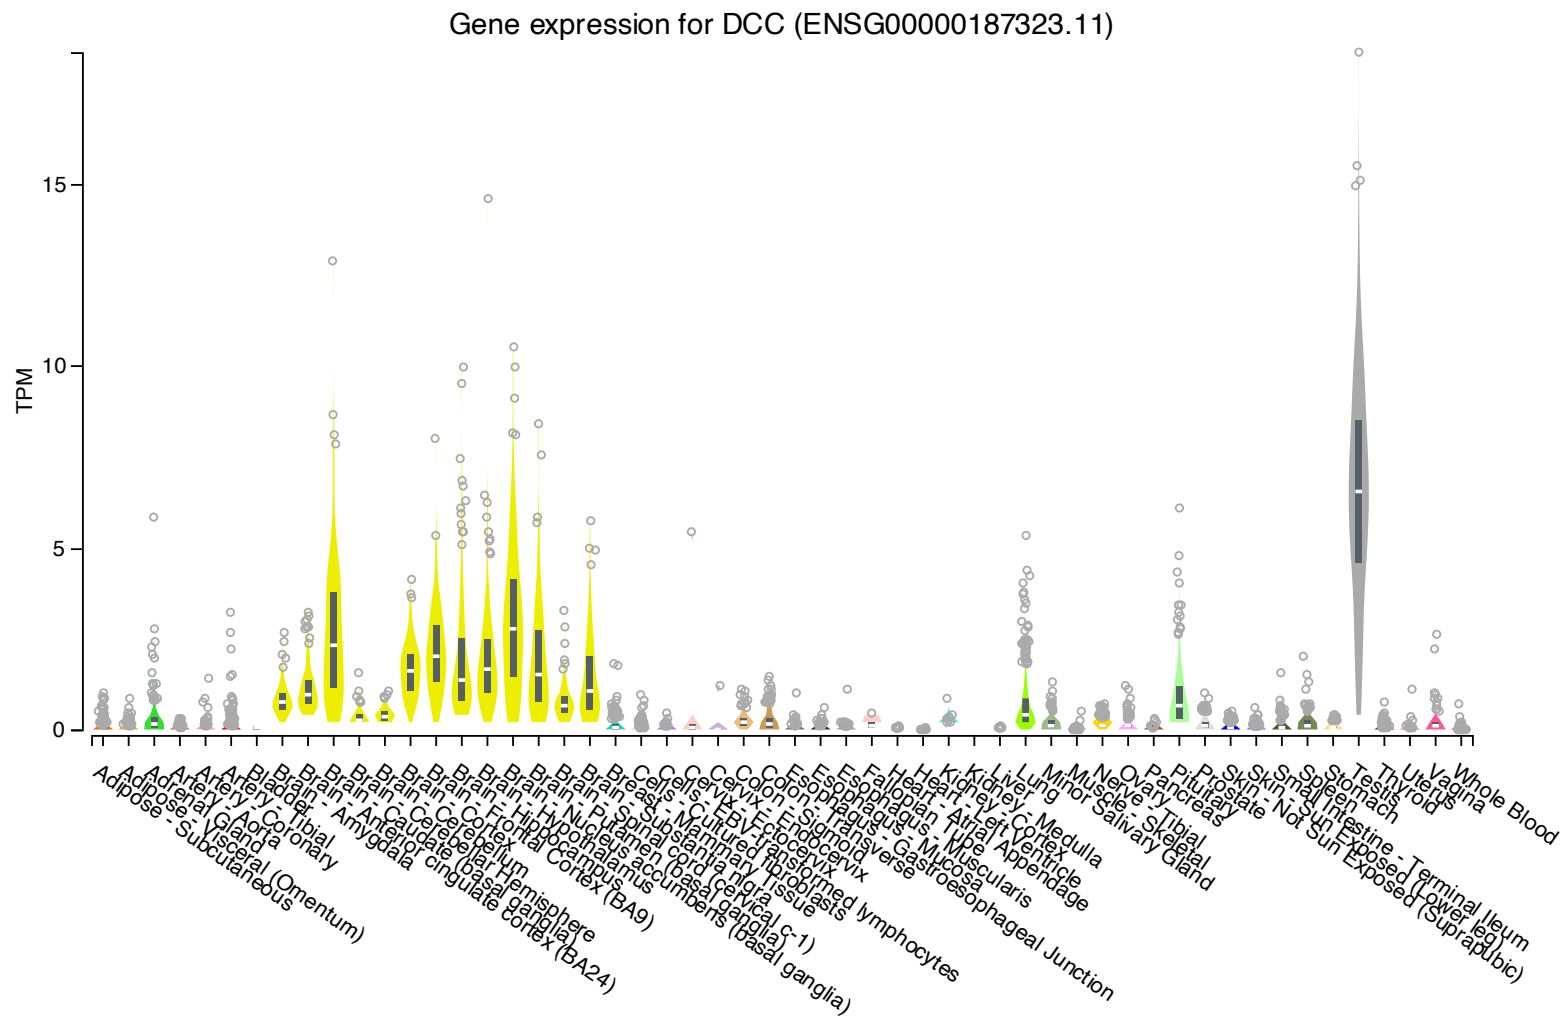



Supplementary Figure 6 – Gene expression profile for *FLOT2* across 54 tissue types in the GTEx project

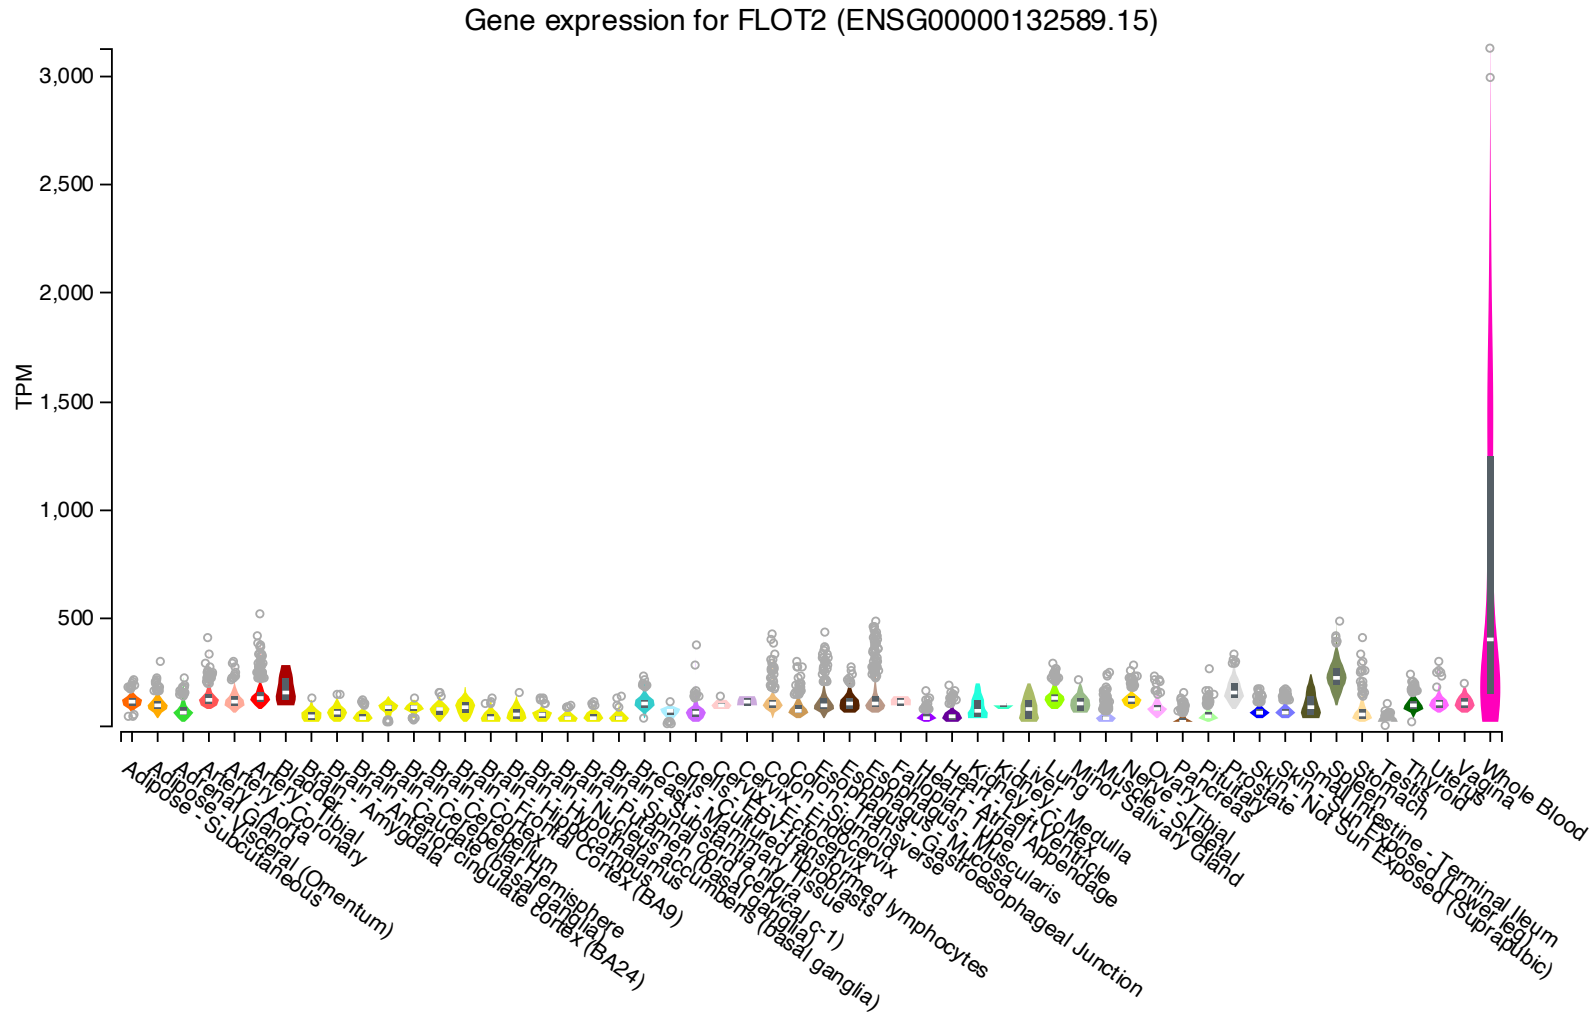





Supplementary Figure 8 – Gene expression profile for *PANK4* across 54 tissue types in the GTEx project

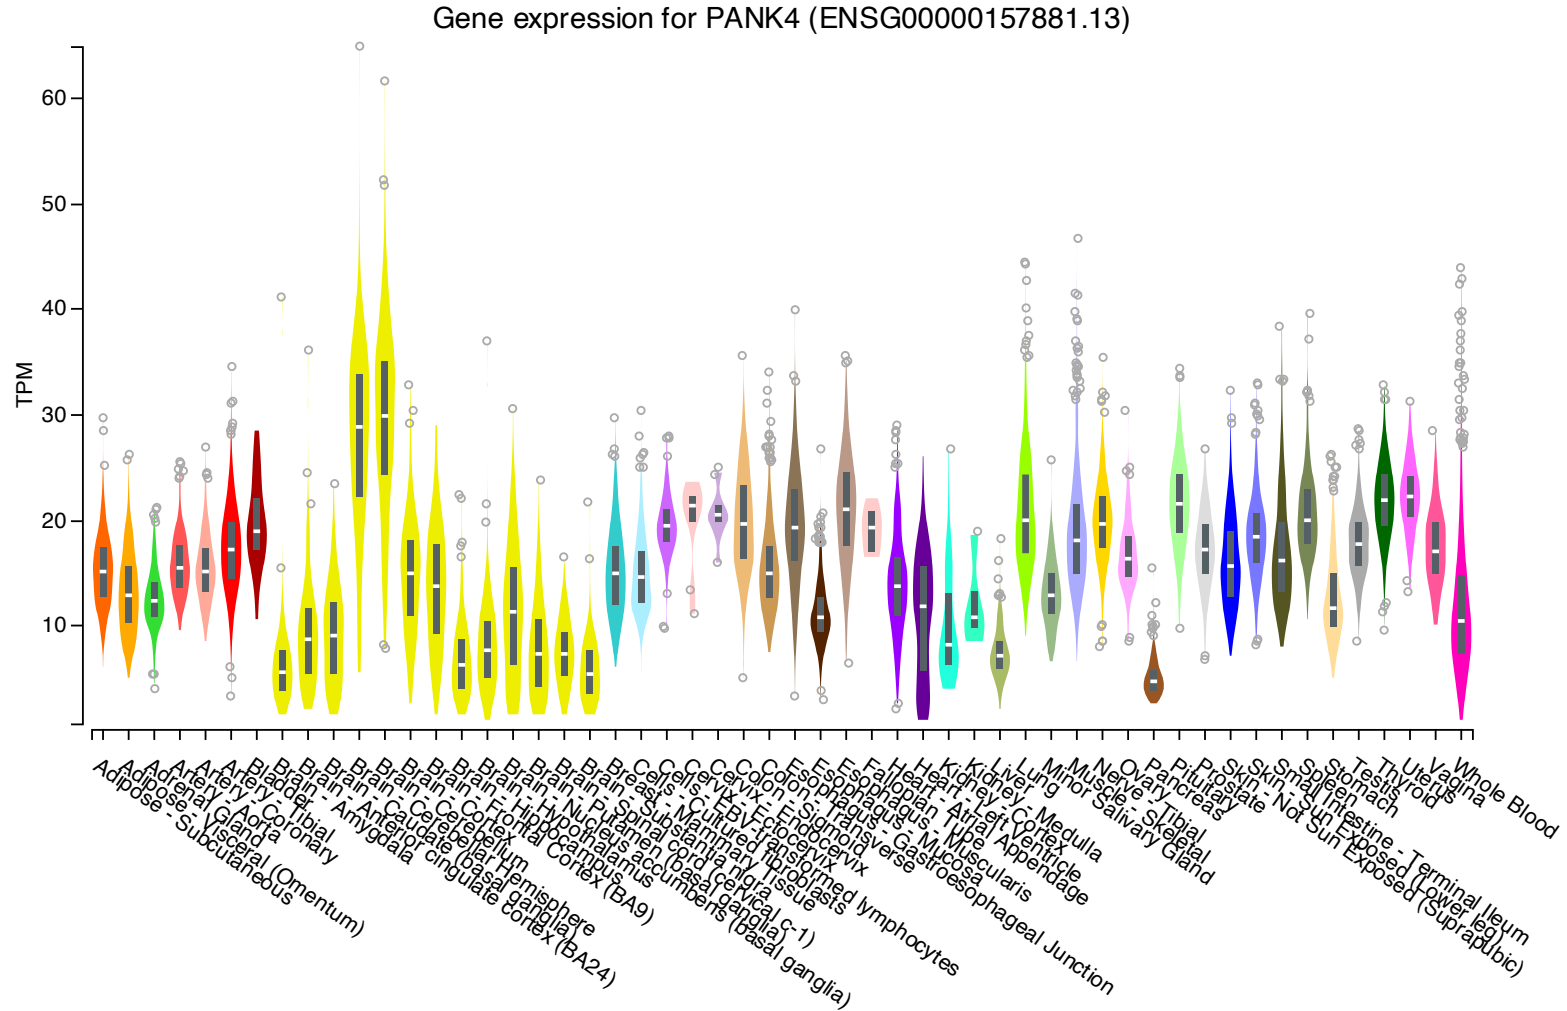





Supplementary Figure 11 – Gene expression profile for *SARM1* across 54 tissue types in the GTEx project

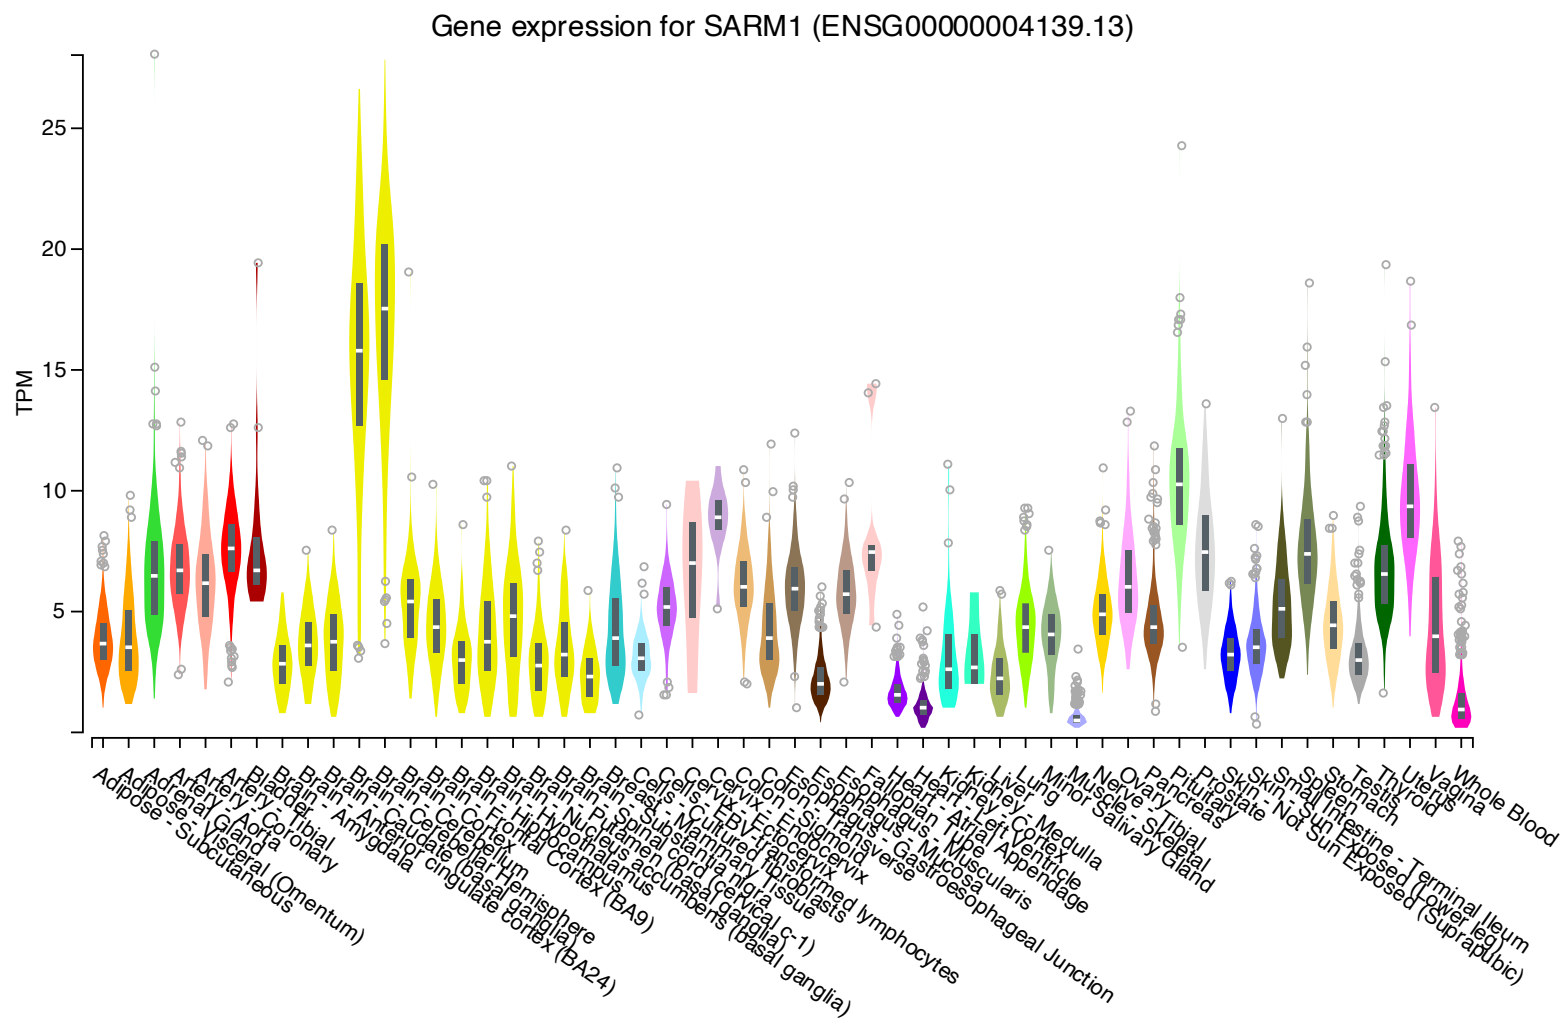

Supplementary Figure 12 – Gene expression profile for *SIDT1* across 54 tissue types in the GTEx project

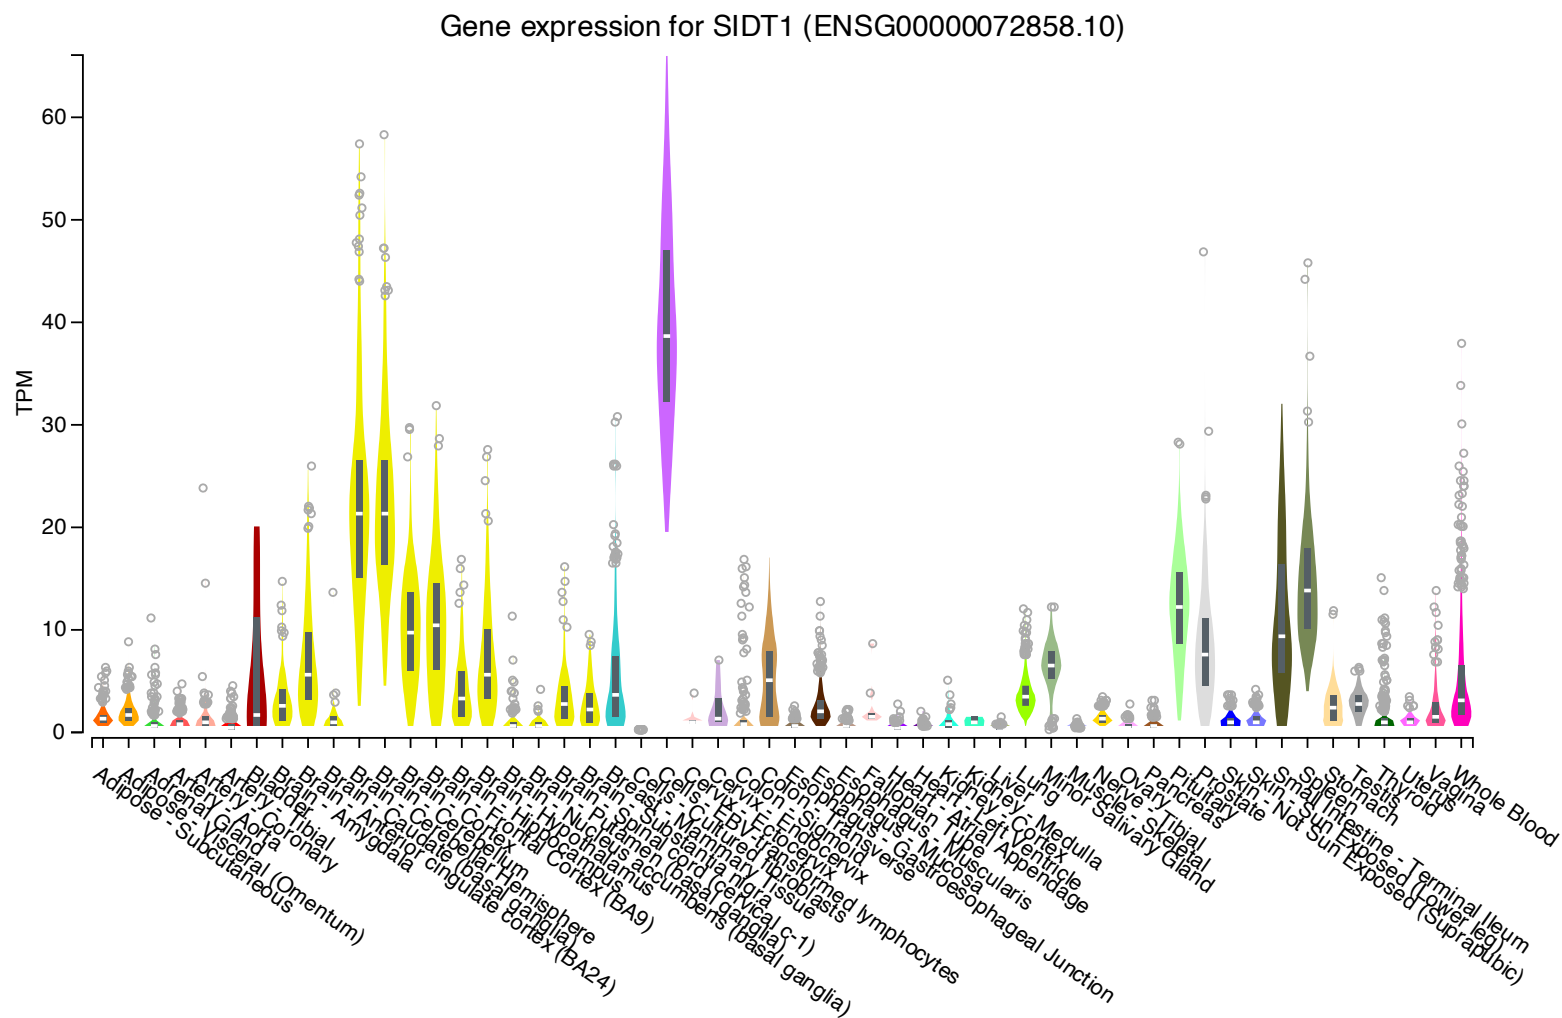



Supplementary Table 1– Characteristics of genome-wide association studies of neurological and psychiatric traits

| Trait/disease                 | Author                          | Year | URL                                                                                                               |
|-------------------------------|---------------------------------|------|-------------------------------------------------------------------------------------------------------------------|
| Alzheimer's disease           | Jansen et al                    | 2019 | <a href="https://ctg.cncr.nl/software/summary_statistics">https://ctg.cncr.nl/software/summary_statistics</a>     |
| Amyotrophic lateral sclerosis | van Rheenen et al               | 2016 | <a href="http://databrowser.projectmine.com/">http://databrowser.projectmine.com/</a>                             |
| Depression                    | Howard et al                    | 2019 | <a href="https://datashare.is.ed.ac.uk/handle/10283/3203">https://datashare.is.ed.ac.uk/handle/10283/3203</a>     |
| Insomnia                      | Jansen et al                    | 2018 | <a href="https://ctg.cncr.nl/software/summary_statistics">https://ctg.cncr.nl/software/summary_statistics</a>     |
| Intelligence                  | Savage et al                    | 2018 | <a href="https://ctg.cncr.nl/software/summary_statistics">https://ctg.cncr.nl/software/summary_statistics</a>     |
| Neuroticism                   | Elsworth et al<br>[unpublished] | 2018 | <a href="http://mrbase.org">mrbase.org</a>                                                                        |
| Schizophrenia                 | Ruderfer et al                  | 2018 | <a href="https://www.med.unc.edu/pgc/results-and-downloads">https://www.med.unc.edu/pgc/results-and-downloads</a> |
